# Supplementary material for: Computed tomography shows high fracture prevalence among physically active forager-horticulturalists with high fertility
Source: eLife journal article supplement (doi:10.7554/elife.48607), 2019-08-16
Supplement: supp [file elife-48607-supp-v1.zip]

Archive with 1 entries (1 files):
- elife_poa_e48607_Transparent_Reporting_File.pdf
